# Supplementary material
Source: publisher figshare collection journal article supplement (https://diabetesjournals.figshare.com/articles/dataset/_/20810833)
Supplement: Supplementary file 2 [file 2]

## **Go-DS21 Principal Investigators**

Yann HERAULT,

Andre STRYDOM

Li CHAN

Marie-Claude POTIER,

Johannes BECKERS,

Pietro LIÒ,

Mara DIERSEN
